# Supplementary material for: Clinical and Genetic Findings in CTNNA1-Associated Macular Pattern Dystrophy
Source: PubMed Central journal article supplement (PMC8162661; doi:10.1016/j.ophtha.2020.10.032), 2021-06
Supplement: mmc2.pdf [file mmc2.pdf]

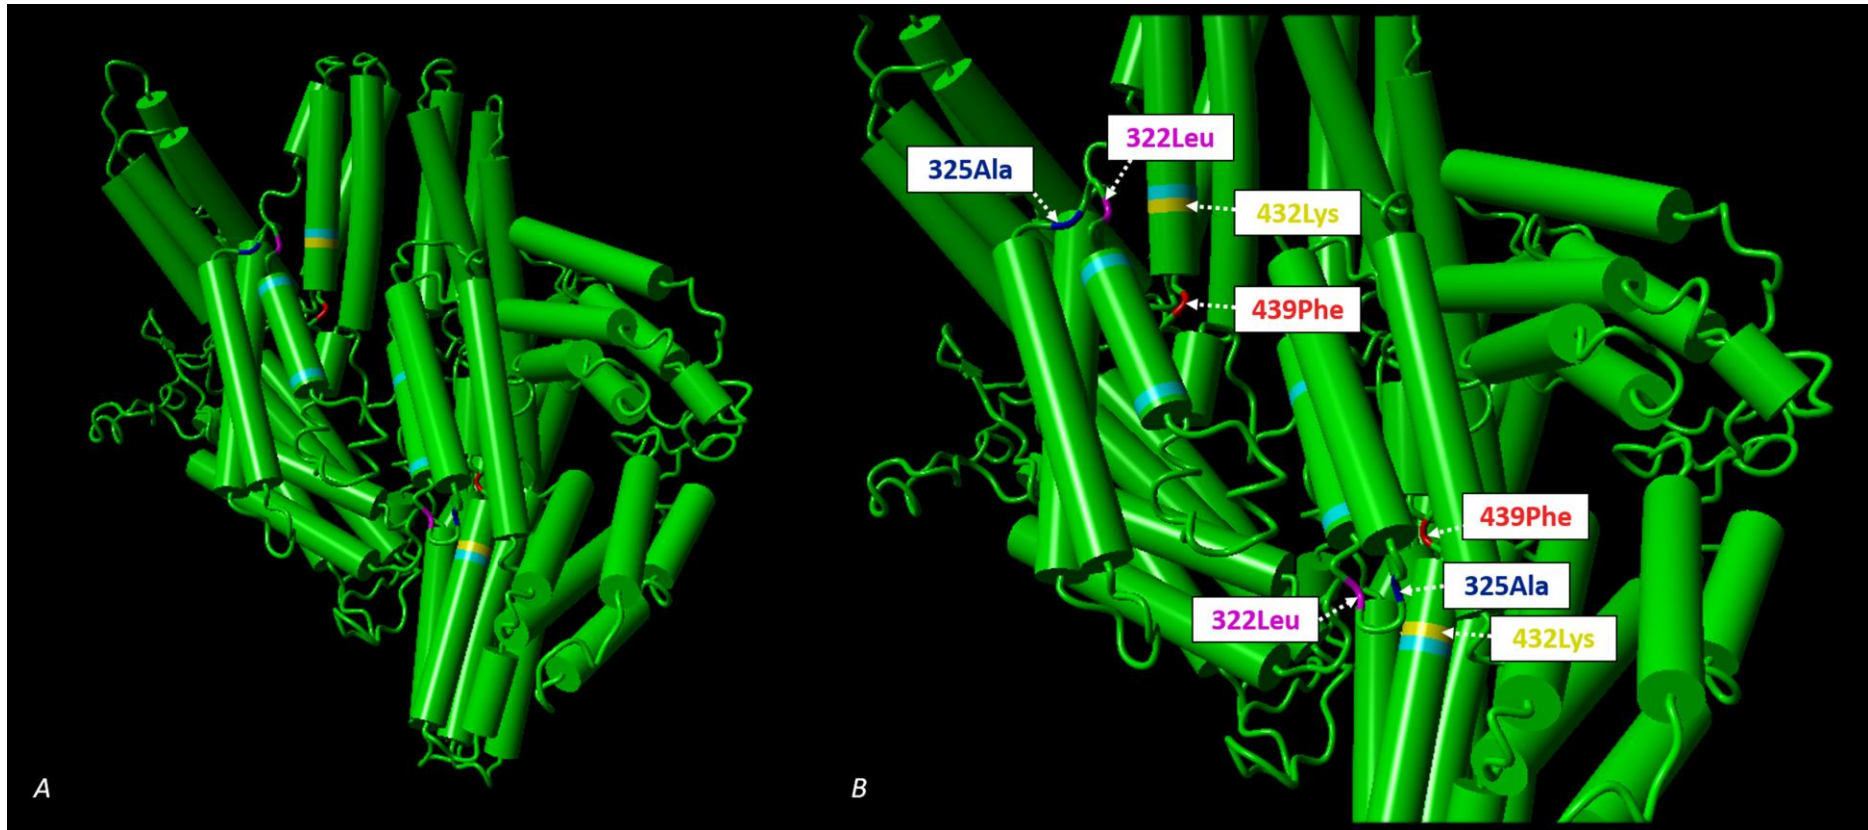

**Supplementary Figure 2. Protein structure with positions of missense changes.** *A*, Three-dimensional predicted protein structure with positions of previously reported changes<sup>1</sup> (shown in blue) as well as those reported in the current study. Three-dimensional structures were produced using online software (Protein Database 4IGG<sup>2</sup> and YASARA<sup>3</sup>). *B*, Magnified version of the region containing the changes, with amino acid changes from the current study labelled (positions 322, 325, 432 and 439; those identified in the previous study were at positions 307, 318 and 431). The c.965C>T and c.1316C>T changes result in substitution of the polar amino acid serine by leucine and phenylalanine respectively (both have hydrophobic side chains). The c. 1294G>A is predicted to change glutamate (negatively charged) to lysine (positively charged). The c.973A>G variant is predicted to change the polar amino acid

threonine to alanine (nonpolar, aliphatic). All four changes were predicted to be “probably damaging” by PolyPhen-2 and disease causing by MutationTaster. The latter predicted the variants to be evolutionarily distant and deleterious. Modelling depicts the variants on the side of the protein that interacts to form a dimer, suggesting dimerization might be compromised. Saksens et al.<sup>1</sup> noted that the disease-associated variants mapped in, or near to, the vinculin binding region; we speculate that the missense changes in our cohort might impact on vinculin binding as well, and lead to compromise of retinal pigment epithelium integrity.

## References

1. Saksens N, Krebs M, Schoenmaker-Koller F, Hicks W, Yu M, Shi L, et al. Mutations in *CTNNA1* cause butterfly-shaped pigment dystrophy and perturbed retinal pigment epithelium integrity. *Nat Genet.* 2016;48(2):144-151.
2. Rangarajan E, Izard T. Dimer asymmetry defines alpha-catenin interactions. *Nat Struct Mol Biol.* 2013;20(2):188-193.
3. Krieger E, Vriend G. YASARA View—molecular graphics for all devices—from smartphones to workstations. *Bioinformatics.* 2014;30(20):2981–2982.
