# Supplementary material for: Clinical and Genetic Findings in CTNNA1-Associated Macular Pattern Dystrophy
Source: PubMed Central journal article supplement (PMC8162661; doi:10.1016/j.ophtha.2020.10.032), 2021-06
Supplement: mmc3.pdf [file mmc3.pdf]

| Family | CTNNA1 variant             | Individual      | Age | Sex | Visual acuity              | Fundus appearance                                                                      | NIR-R                                                                      | AF                                                                                     | OCT                                          | ERG/EOG                                                                          |
|--------|----------------------------|-----------------|-----|-----|----------------------------|----------------------------------------------------------------------------------------|----------------------------------------------------------------------------|----------------------------------------------------------------------------------------|----------------------------------------------|----------------------------------------------------------------------------------|
| 1      | c.965C>T<br>p.(Ser322Leu)  | Proband         | 43  | F   | Right 20/20<br>Left 20/17  | Macular pigmentary clumping, peripheral reticular changes                              | Hyper-reflective areas                                                     | Linear areas of altered AF                                                             | Hyper-reflective subretinal deposit          | ERG, PERG normal. EOG LP:DT ratio subnormal(150%).                               |
|        |                            | Daughter        | 4   | F   | Right 20/40<br>Left 20/40  | Central foveal deposit                                                                 | Foveal intense hyper-reflective lesion                                     | Subtly irregular foveal AF                                                             | Hyper-reflective subretinal deposit          | ERG, PERG normal (skin electrodes, undilated).                                   |
|        |                            | Daughter        | 19  | F   | Right 20/20<br>Left 20/20  | Subtle central altered foveal reflex                                                   | Foveal hyper-reflective lesion                                             | No obvious abnormality                                                                 | Subretinal deposits                          | ERG, PERG normal. EOG LP:DT ratio borderline (right 170%, left 165%).            |
| 2      | c.1316C>T<br>p.(Ser439Phe) | Proband         | 43  | M   | Right 20/17<br>Left 20/17  | Linear areas of hyper and hypo-pigmentation radiating from foveal centre               | Linear areas of hyper-reflectance                                          | Linear areas of hyperAF                                                                | Disturbance at level of outer retina and RPE | ERG, PERG normal. EOG LP:DT ratio subnormal (right 135%, left 145%).             |
|        |                            | Sister          | 38  | F   | Right 20/20<br>Left 20/20  | Subtle pigmentary changes; peripheral areas of atrophy                                 | NA                                                                         | NA                                                                                     | NA                                           | ERG, PERG normal. EOG LP:DT ratio subnormal (145%).                              |
| 3      | c.965C>T<br>p.(Ser322Leu)  | Proband         | 27  | F   | Right 20/20<br>Left 20/20  | Pigmentary clumping                                                                    | Hyper-reflectance in a wing-shaped pattern                                 | Patches of increased AF                                                                | Hyper-reflective subretinal deposit          | ERG, PERG normal.                                                                |
|        |                            | Mother          | 63  | F   | NA<br>(asymptomatic)       | Subtle pigmentary change and extramacular drusen                                       | NA                                                                         | Mild, variable hyper and hypo-AF                                                       | NA                                           | NA                                                                               |
| 4      | c.1316C>T<br>p.(Ser439Phe) | Proband         | 32  | F   | Right 20/30<br>Left 20/17  | Linear areas of pigmentary change                                                      | Linear areas of hyper-reflectance                                          | Linear areas of hyperAF                                                                | Subretinal hyper-reflective deposit          | ERG, PERG normal. EOG LP:DT ratio subnormal (right 125%, left 135%).             |
|        |                            | Maternal cousin | 34  | M   | Right 20/30<br>Left 20/20  | Linear areas of pigmentary change                                                      | Linear areas of hyper-reflectance                                          | Linear areas of hyperAF                                                                | Subretinal hyper-reflective deposit          | ERG, PERG normal.                                                                |
| 5      | c.1294G>A<br>p.(Glu432Lys) | Proband         | 31  | F   | Right 20/20<br>Left 20/20  | Linear areas of pigmentary change                                                      | Linear areas of hyper-reflectance                                          | Subtle patch of hyperAF                                                                | Subretinal hyper-reflective deposit          | ERG, PERG normal.                                                                |
| 6      | c.973A>G<br>p.(Thr325Ala)  | Proband         | 62  | M   | Right 20/200<br>Left 20/30 | Central atrophy in right eye and pigment mottling in left eye (later becoming atrophy) | Foveal hyper-reflectance and surrounding linear areas of hyper-reflectance | Foveal hypoAF in area of atrophy with surrounding linear or reticular areas of hyperAF | Outer retinal atrophy                        | ERG within normal limits (skin electrodes).* EOG normal (right 260%, left 200%). |

**Supplementary Table 1. Summary of genotypes and clinical features of the 11 patients.** Families 1-5 were seen at Moorfields Eye Hospital; the proband from Family 6 was reviewed at the Manchester Centre for Genomic Medicine. The *CTNNA1* variants shown were identified by whole genome sequencing in Family 1 (proband, after specific testing of *PRPH2* found no causative variants), Family 2 (proband and sister, after specific testing of *PRPH2* and *BEST1* in proband was negative) and Family 4 (proband). In Family 3, samples were sent from the proband and her mother for screening of macular dystrophy genes (Molecular Vision Laboratory, Hillsboro, Oregon, Stargardt/Macular Dystrophy Panel, including *ABCA4*, *BEST1*, *CDH3*, *CERKL*, *DRAM2*, *EFEMP1*, *ELOVL4*, *IMPG1*, *IMPG2*, *PROM1*, *PRPH2*, *RP1L1*, *TIMP3*, *TLL5*); no variants were found in these genes, but both patients were found to be heterozygous for the *CTNNA1* variant. In the proband of Family 5, screening of 577 genes associated with retinal dystrophies (Molecular Vision Laboratory, Hillsboro, Oregon) revealed heterozygosity for the above *CTNNA1* variant. In the proband of Family 6, screening of 176 retinal dystrophy genes (Manchester Centre for Genomic Medicine, retinal dystrophy panel) was negative; subsequent whole exome sequencing revealed the above heterozygous change in *CTNNA1*. No other variants were found in any other genes in any of the patients that could explain the phenotype. No other individuals were tested. Ages and visual acuities are at presentation. Electrophysiological testing was performed in most cases according to international standards. The EOG light peak to dark trough (LP:DT) ratios were measured, and compared with those in an unaffected control group (Mean - 2 standard deviations = 165%; reference interval 180% to 435%; n=30). NIR-R, near infrared reflectance; AF, autofluorescence (blue or green autofluorescence); OCT, spectral domain optical coherence tomography; ERG, electroretinogram (full-field); PERG, pattern electroretinogram; EOG, electro-oculogram; RPE, retinal pigment epithelium.

\*For the Family 6 proband, full-field ERGs were recorded with skin electrodes and appeared within normal limits (with the possible exception of the dark-adapted strong flash ERG b:a ratio, considered equivocal).
